# Supplementary material for: Discriminative potential of ion mobility spectrometry for the detection of fentanyl and fentanyl analogues relative to confounding environmental interferents
Source: Royal Society of Chemistry journal article supplement (doi:10.1039/c9an01771b), 2019-01-01
Supplement: c9an01771b1.pdf [file c9an01771b1.pdf]

# Supporting Information for: Discriminative potential of ion mobility spectrometry for the detection of fentanyl and fentanyl analogues relative to confounding environmental interferents

Thomas P. Forbes\*, Jeffrey Lawrence, Jennifer R. Verkouteren, and R. Michael Verkouteren  
*National Institute of Standards and Technology, Materials Measurement Science Division, Gaithersburg, MD, USA*

\* Corresponding author: E-mail: [thomas.forbes@nist.gov](mailto:thomas.forbes@nist.gov)

## Supporting Information Table of Contents

### Experimental Methods

**Sample and Data Collection.**

**Data Processing.**

### Supplemental Data and Figures

**Scheme S1.** Graphical representation of ROC curve generation from signal distributions.

**Table S1.** Replicates, mass loadings, and IMS response signal intensities on the AE instrument.

**Table S2.** Replicates, mass loadings, and IMS response signal intensities on the N/E instrument.

**Figure S1.** IMS response of heroin in the laboratory and at the gate location on the N/E instrument.

**Figure S2.** Environmental background intensities at each target as function of time: AE instrument.

**Figure S3.** Environmental background intensities at each target as function of time: N/E instrument.

**Figure S4.** True positive intensity histograms at three masses for each target: AE instrument.

**Figure S5.** True positive intensity histograms at three masses for each target: N/E instrument.

**Figure S6.** Representative IMS spectra for select fentanyl species on AE and N/E instruments.

**Figure S7.** Desorption time of maximum peak intensity on the AE instrument: BG and TP.

**Figure S8.** Desorption time of maximum peak intensity on the N/E instrument: BG and TP.

**Figure S9.** Measured reduced mobilities as a function of decreasing mass for select targets.

**Figure S10.** Environmental interferent intensities as function of reduced mobility and drift time.

**Figure S11.** Environmental background intensity histograms at each target: AE instrument.

**Figure S12.** Environmental background intensity histograms at each target: N/E instrument.

**Figure S13.** Demonstrative IMS spectra of common interferent observed in background.

**Figure S14.** ROC curves for three mass loading of each target: AE instrument.

**Figure S15.** ROC curves for three mass loading of each target: N/E instrument.

**Sample and Data Collection.** True positive IMS measurements were conducted using standard narcotic samples or solutions diluted in methanol to nominal concentrations of (1, 10, or 100)  $\mu\text{g/mL}$  depending upon desired mass deposition. Solutions were cast onto meta-aramid substrates in volumes not exceeding 2  $\mu\text{L}$  to limit the total wicking area to less than 2.0  $\text{cm}^2$ . In cases where additional volume was required to meet mass expectations, deposition was completed in increments such that the first deposit was allowed to dry before the next deposit was delivered. Wherever possible, samples were analyzed from lowest mass to highest mass to reduce peak intensity inflation due to instrument memory and residual material. In addition, cleardown cycles were conducted between true positive samples to ensure no carry over was observed.

**Data Processing.** A custom MATLAB-based code (MATLAB, R2017a, Mathworks, Inc., Natick, MA, USA) was developed to extract and process the raw signal data for each file. The data files provided extensive details of the instrument settings, parameters, target analyte channels, and alarm settings. Drift times and segment data for both Tube 1 and Tube 2 were provided, however for this study only Tube 1 data was considered (positive mode – narcotics). The raw IMS spectra data consisted of drift times and signal data for each “segment”. These segments were comprised of the average data from a specified number of scans (across the range of drift times) and the number of scans per segment varied across two to three analysis periods per test based on the system parameters. These settings, along with the calibrant peak position and reduced mobility, reference location for baseline correction, and sample acquisition date were extracted for processing.

The extracted raw data and system settings were used to reconstruct the 3D data (signal intensity as a function of drift time/reduced mobility and segment) for each sample. Based on user-defined peak definition parameters, each segment was scanned for peaks within the specified window around each target reduced mobility value. Target reduced mobilities (and windows) were converted to drift times based on

the calibrant drift time and reduced mobility determined by the instrument firmware and specified in each raw data file.

**Scheme S1.** General receiver operating characteristic curve creation from background interferent signal and target analyte signal distributions. The below confusion matrix is created for varying of the alarm threshold, and at each point the true positive and false positive rates determined and plotted in ROC space.

| IMS Response | True Condition Status |                     | Total |
|--------------|-----------------------|---------------------|-------|
|              | Positive              | Negative            |       |
| Positive     | True Positive (TP)    | False Positive (FP) | TP+FP |
| Negative     | False Negative (FN)   | True Negative (TN)  | FN+TN |
| Total        | TP+FN                 | FP+TN               |       |

$$\text{Sensitivity} = \text{TPR} = \text{TP}/(\text{TP}+\text{FN})$$

$$\text{Specificity} = 1 - \text{FPR} = 1 - \text{FP}/(\text{FP}+\text{TN})$$

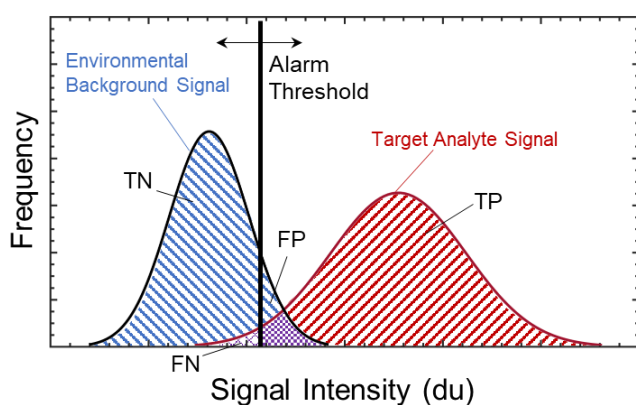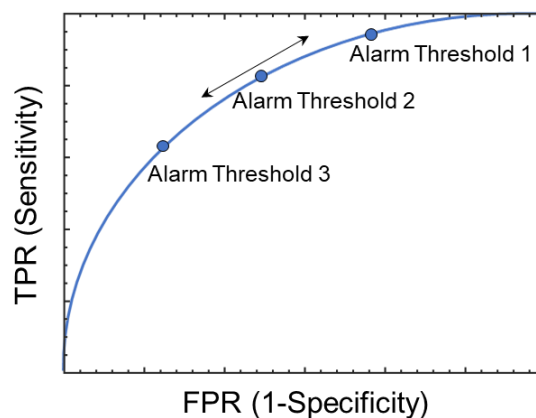

**Table S1.** Nominal number of replicates, nominal mass loadings, and IMS response signal intensities (du) at each mass loading (median, lower (Q1) and upper (Q3) quartiles) for each compound under laboratory conditions for the AE instrument.

| AE | Analyte                                      | Reps.<br>at each<br>mass | Low (ng)<br><i>Signal (du)</i><br><i>Med. (Q1-Q3)</i> | Mid (ng)<br><i>Signal (du)</i><br><i>Med. (Q1-Q3)</i> | High (ng)<br><i>Signal (du)</i><br><i>Med. (Q1-Q3)</i> | Elevated (ng)<br><i>Signal (du)</i><br><i>Med. (Q1-Q3)</i> |
|----|----------------------------------------------|--------------------------|-------------------------------------------------------|-------------------------------------------------------|--------------------------------------------------------|------------------------------------------------------------|
| 1  | Carfentanil                                  | 5                        |                                                       |                                                       |                                                        | 50<br>80.0 (66.0-110)                                      |
| 2  | Valeryl fentanyl                             | 10                       | 30<br>20.5 (14.0-23.8)                                | 40<br>32.0 (28.5-42.3)                                | 60<br>66.5 (38.3-70.5)                                 | 150<br>361 (352-397.5)                                     |
| 3  | Furanyl fentanyl                             | 30                       | 30<br>23.0 (15.0-32.0)                                | 50<br>33.0 (23.3-59.3)                                | 60<br>85.0 (28.8-135.8)                                | 150<br>266 (229-318)                                       |
| 4  | <i>p</i> -Fluoroisobutryl<br>fentanyl (FIBF) | 3                        |                                                       |                                                       |                                                        | 50<br>219 (146-267)                                        |
| 5  | Crotonyl fentanyl                            | 10                       | 45<br>23.0 (20.0-35.8)                                | 50<br>37.5 (24.8-48.3)                                | 60<br>71.5 (56.3-88.8)                                 | 60<br>71.5 (56.3-88.8)                                     |
| 6  | Butyryl fentanyl                             | 30                       | 20<br>24.0 (14.3-29.8)                                | 30<br>28.0 (20.0-48.8)                                | 40<br>65.5 (50.0-99.8)                                 | 50<br>128.5 (72.0-134)                                     |
| 7  | <i>trans</i> -3-<br>methylfentanyl           | 3                        |                                                       |                                                       |                                                        | 30<br>90.0 (86.0-99.0)                                     |
| 8  | Cyclopropyl<br>fentanyl                      | 10                       | 30<br>12.5 (10.0-17.3)                                | 50<br>35.5 (33.0-46.8)                                | 60<br>58.5 (47.0-66.5)                                 | 60<br>58.5 (47.0-66.5)                                     |
| 9  | Heroin                                       | 30                       | 25<br>55.0 (17.3-78.0)                                | 50<br>86.5 (51.0-133.3)                               | 125<br>252.5 (184.5-309.0)                             | 150<br>313 (293-340)                                       |
| 10 | Fentanyl                                     | 30                       | 7.5<br>13.0 (8.0-25.0)                                | 15<br>34.0 (26.0-55.0)                                | 20<br>62.0 (42.0-80.8)                                 | 150<br>294 (255-330)                                       |
| 11 | Acryl fentanyl                               | 10                       | 20<br>31.0 (22.3-36.5)                                | 30<br>45.5 (33.5-62.8)                                | 40<br>76.5 (59.0-103.5)                                | 40<br>477 (394-500)                                        |
| 12 | Acetyl fentanyl                              | 10                       | 10<br>17.5 (13.8-23.5)                                | 25<br>41.0 (33.8-47.5)                                | 30<br>56.5 (49.8-68.5)                                 | 50<br>93.5 (84.3-117)                                      |
| 13 | Benzyl fentanyl                              | 30                       | 10<br>24.0 (17.0-32.8)                                | 12<br>42.0 (27.3-60.3)                                | 20<br>64.0 (39.5-96.5)                                 | 50<br>154 (154-226.5)                                      |
| 14 | U-47700                                      | 10                       | 5<br>23.0 (11.0-49.3)                                 | 7<br>48.0 (34.0-73.5)                                 | 10<br>118.5 (73.3-167.0)                               | 50<br>321 (201-382)                                        |
| 15 | Norfentanyl                                  | 30                       | 15<br>56.0 (43.5-88.0)                                | 25<br>105.5 (68.8-146)                                | 35<br>166.5 (94.3-217.3)                               | 150<br>531 (523-562)                                       |
| 16 | Acetyl norfentanyl                           | 10                       | 8<br>30.0 (15.5-55.0)                                 | 10<br>48.8 (39.5-69.0)                                | 12<br>122.0 (79.5-135.5)                               | 50<br>335 (309-340)                                        |

**Table S2.** Nominal number of replicates, nominal mass loadings, and IMS response signal intensities (du) at each mass loading (median, lower (Q1) and upper (Q3) quartiles) for each compound under laboratory conditions for the N/E instrument.

| N/E | Analyte                                      | Reps.<br>at each<br>mass | Low (ng)<br><i>Signal (du)</i><br><i>Med. (Q1-Q3)</i> | Mid (ng)<br><i>Signal (du)</i><br><i>Med. (Q1-Q3)</i> | High (ng)<br><i>Signal (du)</i><br><i>Med. (Q1-Q3)</i> | Elevated (ng)<br><i>Signal (du)</i><br><i>Med. (Q1-Q3)</i> |
|-----|----------------------------------------------|--------------------------|-------------------------------------------------------|-------------------------------------------------------|--------------------------------------------------------|------------------------------------------------------------|
| 1   | Carfentanil                                  | 5                        |                                                       |                                                       |                                                        | 20<br>192 (183-205)                                        |
| 2   | Valeryl fentanyl                             | 10                       | 1.5<br>23.8 (16.4-28.3)                               | 2<br>28.6 (25.4-41.2)                                 | 4<br>52.8 (46.5-62.5)                                  | 20<br>601 (466-662)                                        |
| 3   | Furanyl fentanyl                             | 30                       | 2<br>18.5 (13.3-24.8)                                 | 4<br>42.7 (33.2-52.5)                                 | 6<br>79.9 (50.1-105.1)                                 | 20<br>280 (260-391)                                        |
| 4   | <i>p</i> -Fluoroisobutryl<br>fentanyl (FIBF) | 10                       | 1.5<br>23.3 (17.6-31.2)                               | 3.5<br>48.4 (37.1-61.1)                               | 5<br>59.8 (55.6-66.3)                                  | 20<br>139 (106-227)                                        |
| 5   | Crotonyl fentanyl                            | 10                       | 2<br>15.4 (2.7-21.0)                                  | 4<br>32.7 (25.5-39.1)                                 | 6<br>54.9 (6.7-82.0)                                   | 20<br>160 (139-208)                                        |
| 6   | Butyryl fentanyl                             | 30                       | 1<br>12.8 (0-19.6)                                    | 1.5<br>52.5 (35.7-65.9)                               | 4<br>75.4 (50.7-107.1)                                 | 20<br>436 (408-525)                                        |
| 7   | <i>trans</i> -3-<br>methylfentanyl           | 5                        |                                                       |                                                       |                                                        | 20<br>172 (172-193)                                        |
| 8   | Cyclopropyl<br>fentanyl                      | 10                       | 3<br>44.0 (36.7-56.8)                                 | 6<br>69.3 (55.6-77.9)                                 | 20<br>173.4 (143.8-201.4)                              | 100<br>686 (646-751)                                       |
| 9   | Heroin                                       | 30                       | 2<br>21.2 (0-28.0)                                    | 5<br>42.7 (18.4-60.1)                                 | 10<br>71.3 (55.0-120.8)                                | 20<br>343 (284-378)                                        |
| 10  | Fentanyl                                     | 30                       | 0.05<br>11.8 (0-18.8)                                 | 0.1<br>22.7 (14.7-36.1)                               | 0.2<br>55.1 (35.1-75.9)                                | 20<br>1062 (1053-1062)                                     |
| 11  | Acryl fentanyl                               | 10                       | 2<br>10.3 (0-26.7)                                    | 3<br>27.4 (20.4-38.1)                                 | 4<br>50.5 (48.5-57.5)                                  | 20<br>353 (325-372)                                        |
| 12  | Acetyl fentanyl                              | 10                       | 1<br>38.2 (25.3-53.2)                                 | 2<br>68.5 (46.4-87.4)                                 | 5<br>80.9 (61.8-132.6)                                 | 20<br>437 (379-448)                                        |
| 13  | Benzyl fentanyl                              | 30                       | 1<br>23.0 (14.8-34.5)                                 | 1.25<br>36.9 (32.0-50.3)                              | 1.5<br>55.2 (38.8-63.3)                                | 20<br>706 (703-766)                                        |
| 14  | U-47700                                      | 10                       | 0.2<br>26.1 (24.1-29.3)                               | 0.5<br>46.8 (30.5-51.4)                               | 1<br>70.2 (68.1-87.1)                                  | 20<br>614 (577-675)                                        |
| 15  | Norfentanyl                                  | 30                       | 1<br>29.7 (22.7-36.4)                                 | 1.5<br>64.8 (51.6-77.5)                               | 2<br>94.8 (76.4-119.1)                                 | 20<br>472 (330-658)                                        |
| 16  | Acetyl norfentanyl                           | 10                       | 0.75<br>33.6 (23.7-40.2)                              | 1.5<br>53.5 (49.9-67.7)                               | 2<br>75.5 (62.2-98.2)                                  | 20<br>728 (696-744)                                        |

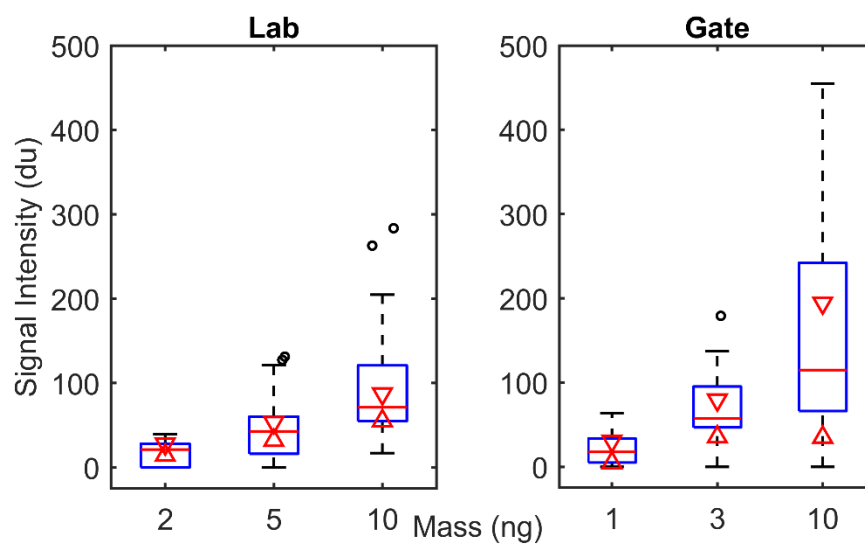

**Figure S1.** Comparison of IMS response to heroin in the laboratory and at the deployed gate location for a number of low mass loadings using the N/E configuration. Boxes represent the median and lower (Q1) and upper (Q3) quartiles, whiskers represent 1.5× the interquartile range (length of the box), and outliers (o) represent values out of the whisker range, and triangular markers represent 95% confidence intervals ( $\text{median} \pm 1.57(Q3-Q1)/\sqrt{n}$ ).

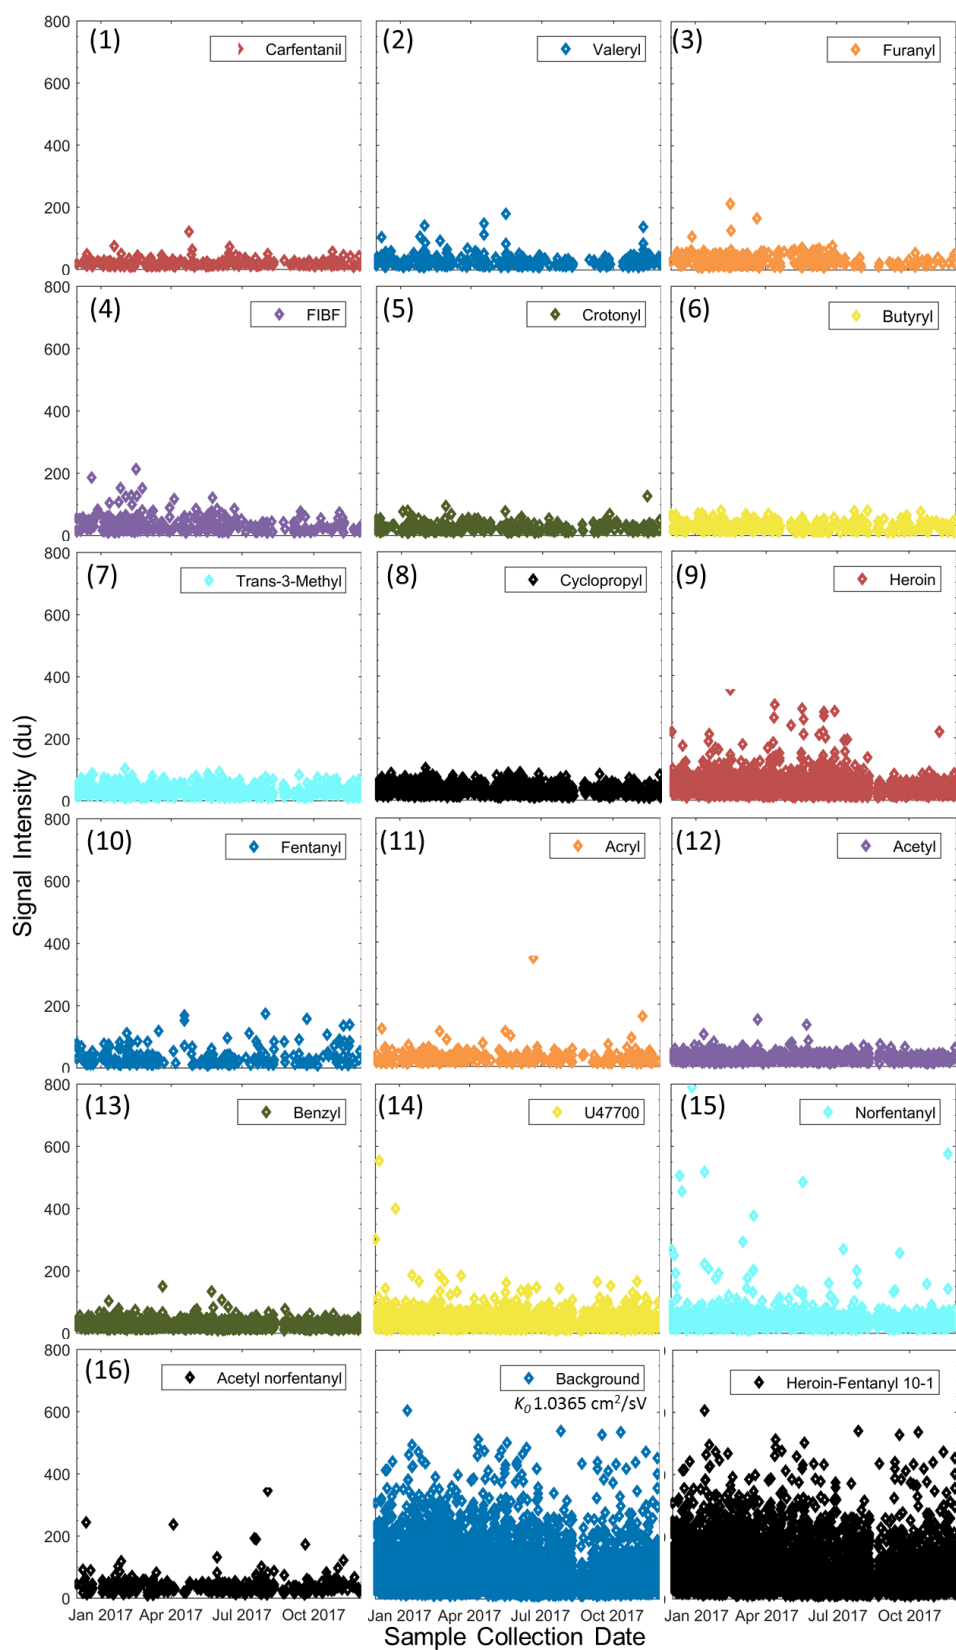

**Figure S2.** Environmental background intensity data within  $\pm 0.003 \text{ cm}^2/\text{sV}$  of each target analyte reduced mobility from the AE IMS instrument during deployment across a yearlong period (9,359 samples).

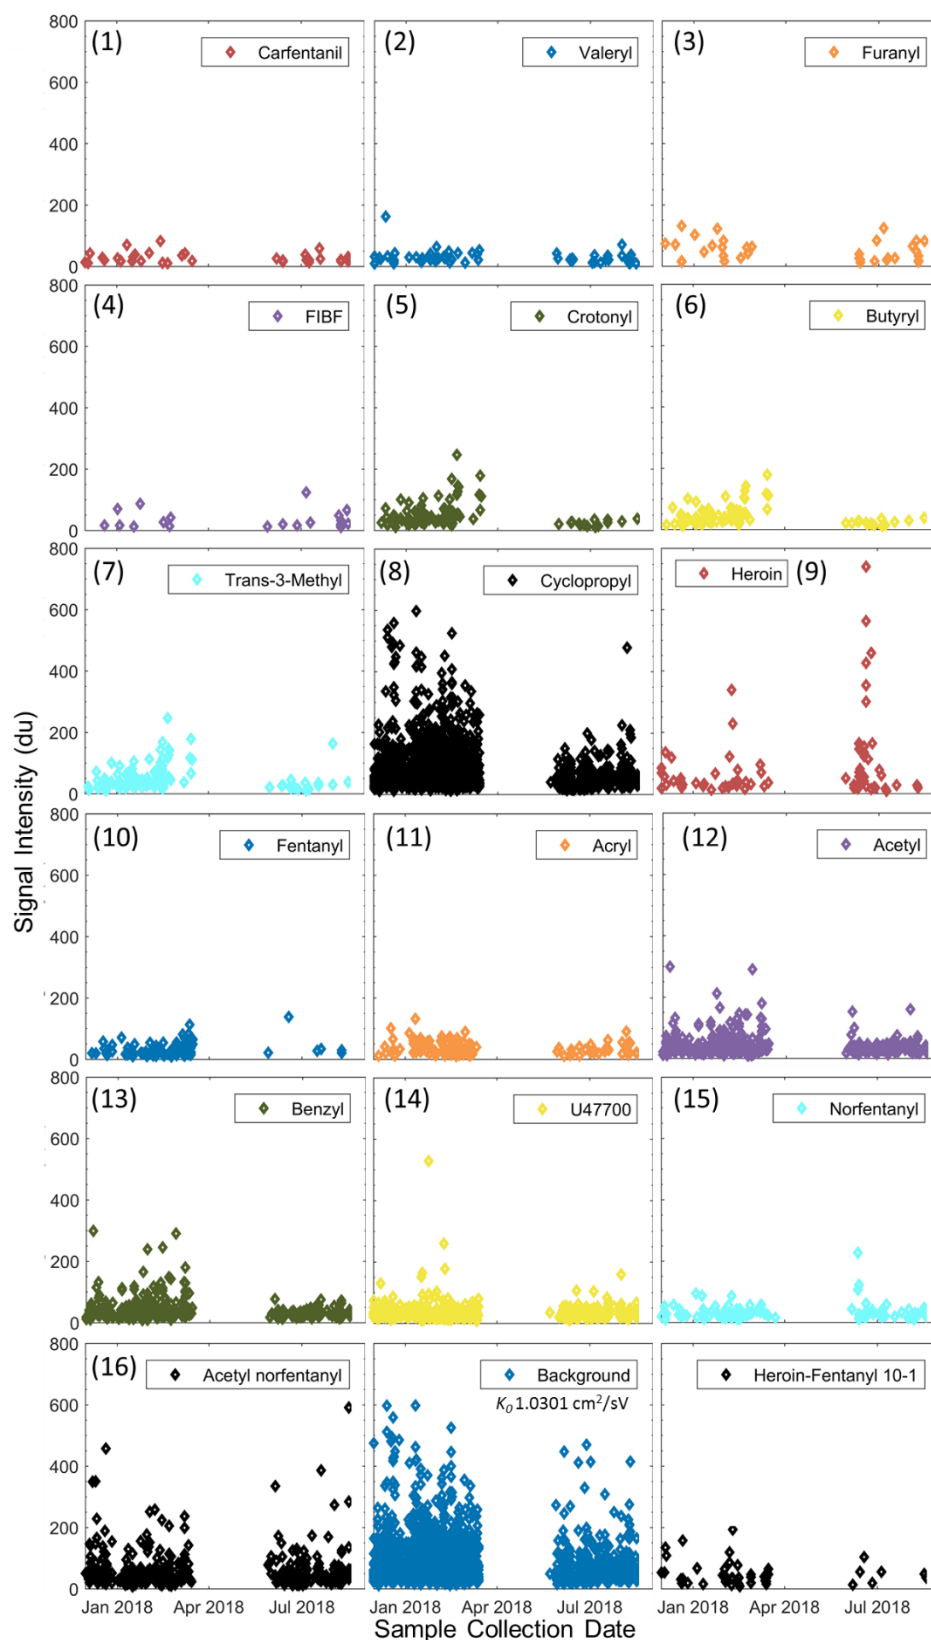

**Figure S3.** Environmental background intensity data within  $\pm 0.003 \text{ cm}^2/\text{sV}$  of each target analyte reduced mobility from the N/E IMS instrument during deployment across a multi-month period (1,996 samples).



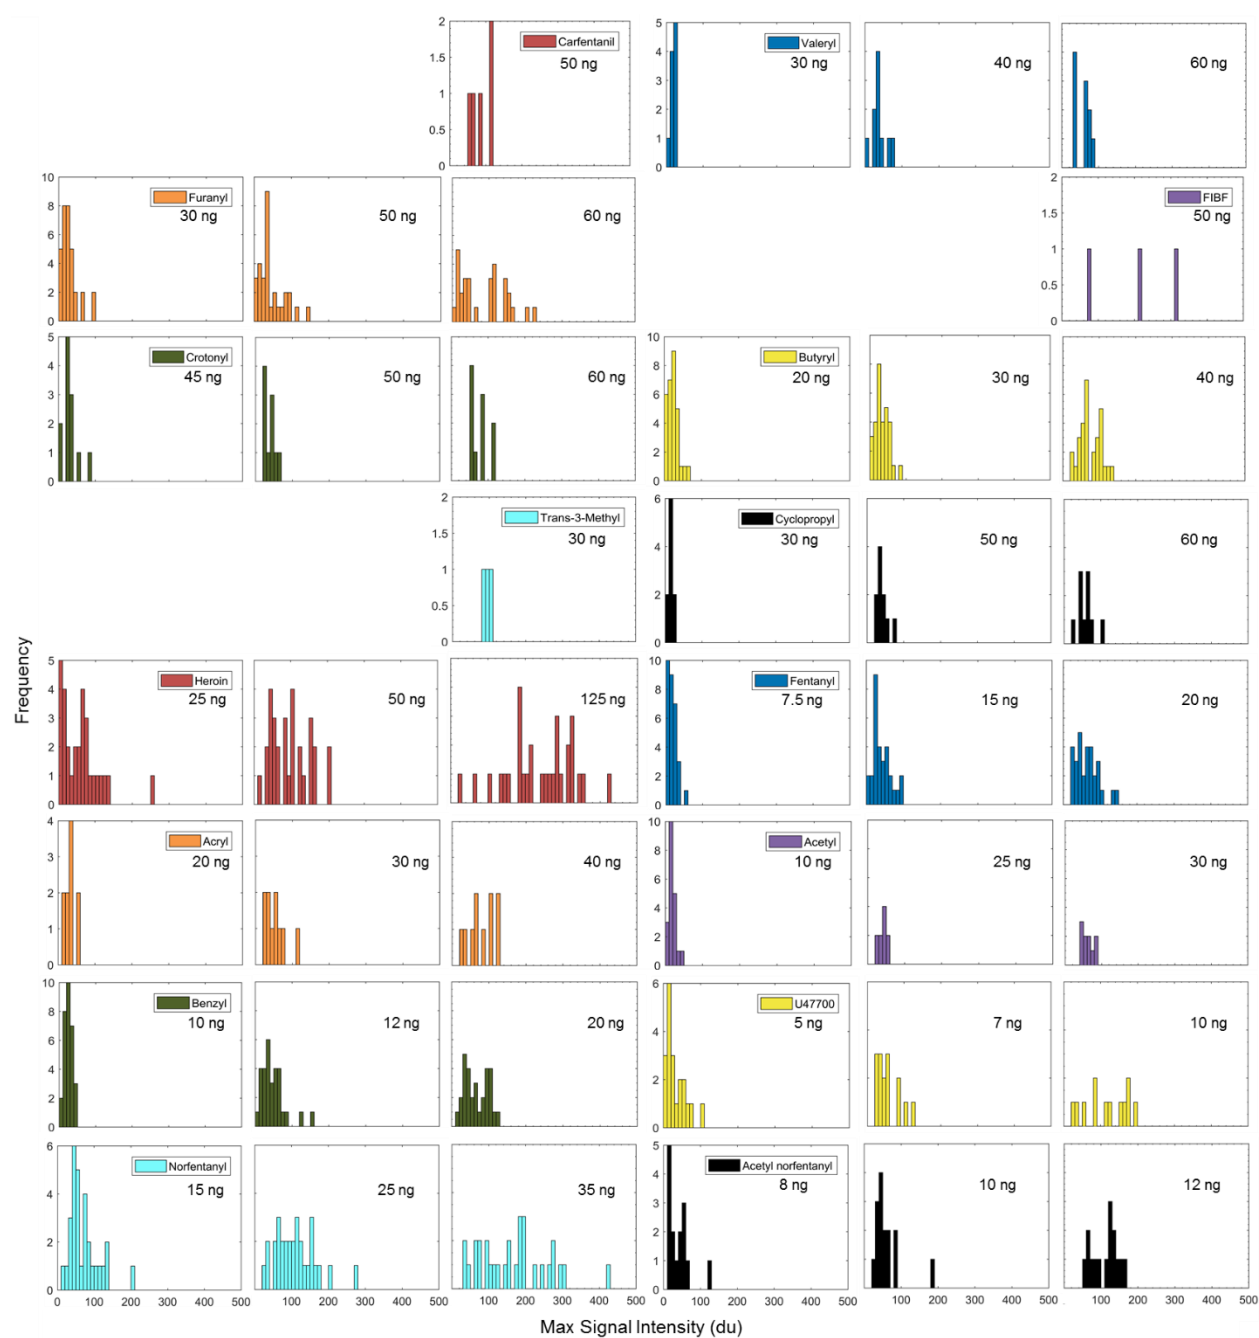

**Figure S4.** Frequency histograms of true positive target analyte intensity data for three mass loadings (Table 2) on the AE IMS instrument operated under laboratory conditions.

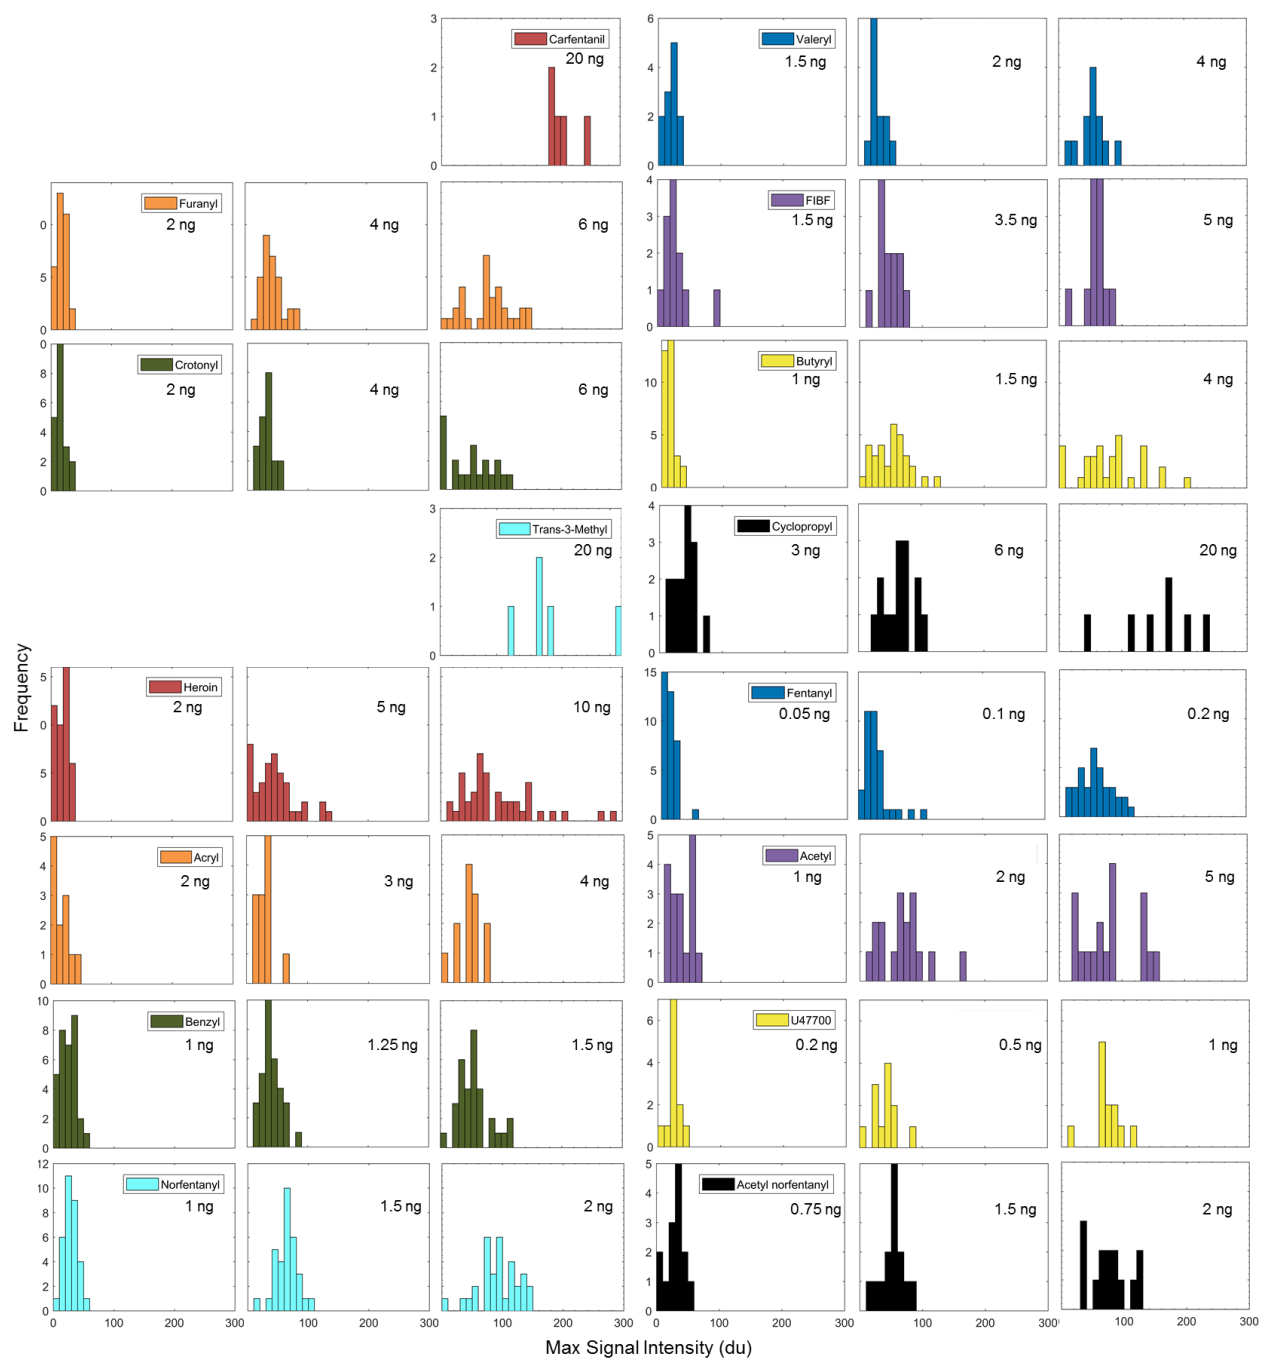

**Figure S5.** Frequency histograms of true positive target analyte intensity data for three mass loadings (Table 3) on the N/E IMS instrument operated under laboratory conditions.

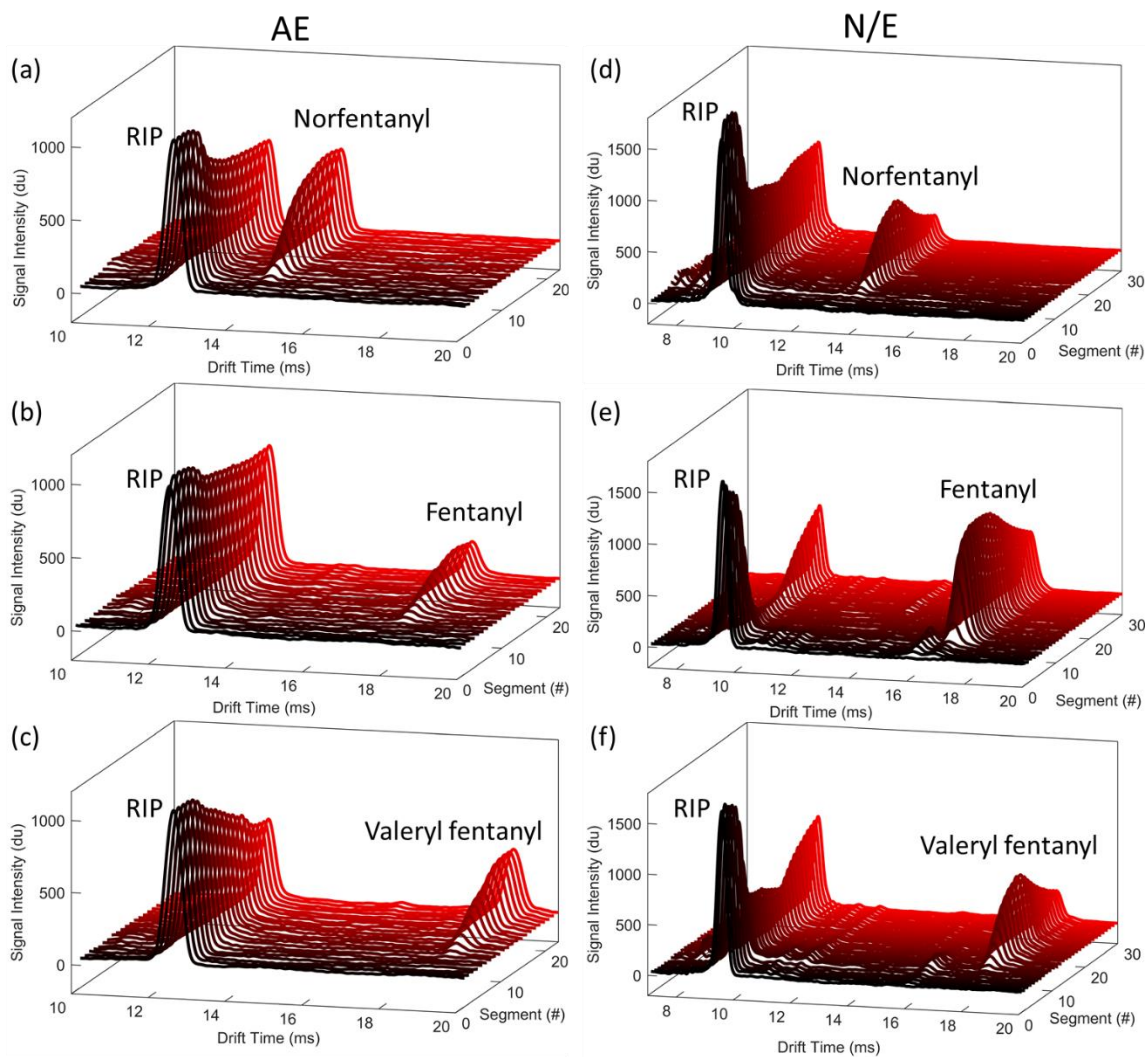

**Figure S6.** Representative IMS spectra as a function of drift time and segment number for norfentanyl ((a) and (d)), fentanyl ((b) and (e)), and valeryl fentanyl ((c) and (f)). (a) – (c) and (d) – (f) represent IMS spectra from the AE instrument at 150 ng loading and N/E instrument at 20 ng loading for each, respectively. (RIP: reactant ion peak).

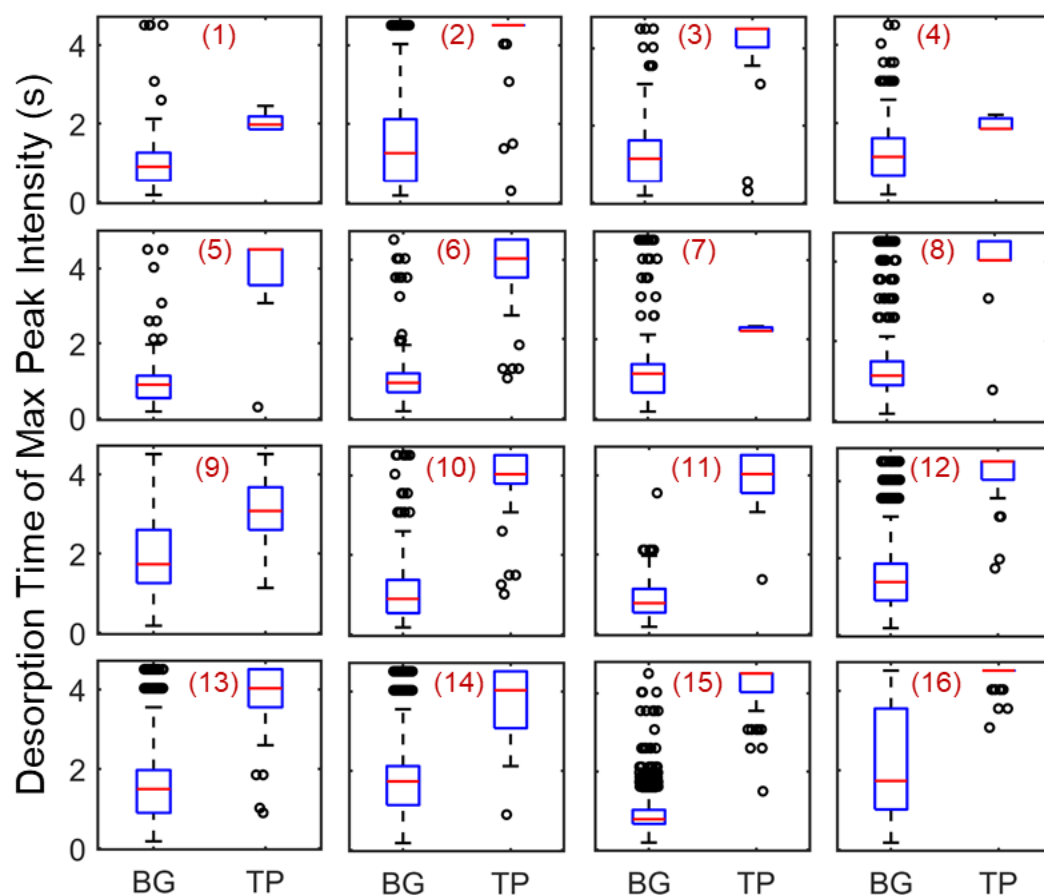

**Figure S7.** Desorption time of the maximum peak intensity of environmental background (BG) observed at each target compound's reduced mobility window, compared to the true positive (TP) target compound maximum peak intensity time (across all mass loadings investigated) on the AE configured instrument (5 s total sampling time). Boxes represent the median and lower and upper quartiles, whiskers represent  $1.5 \times$  the interquartile range (length of the box), and outliers (o) represent values out of the whisker range. Analyte labels (#) correspond to identifications in Table 2.

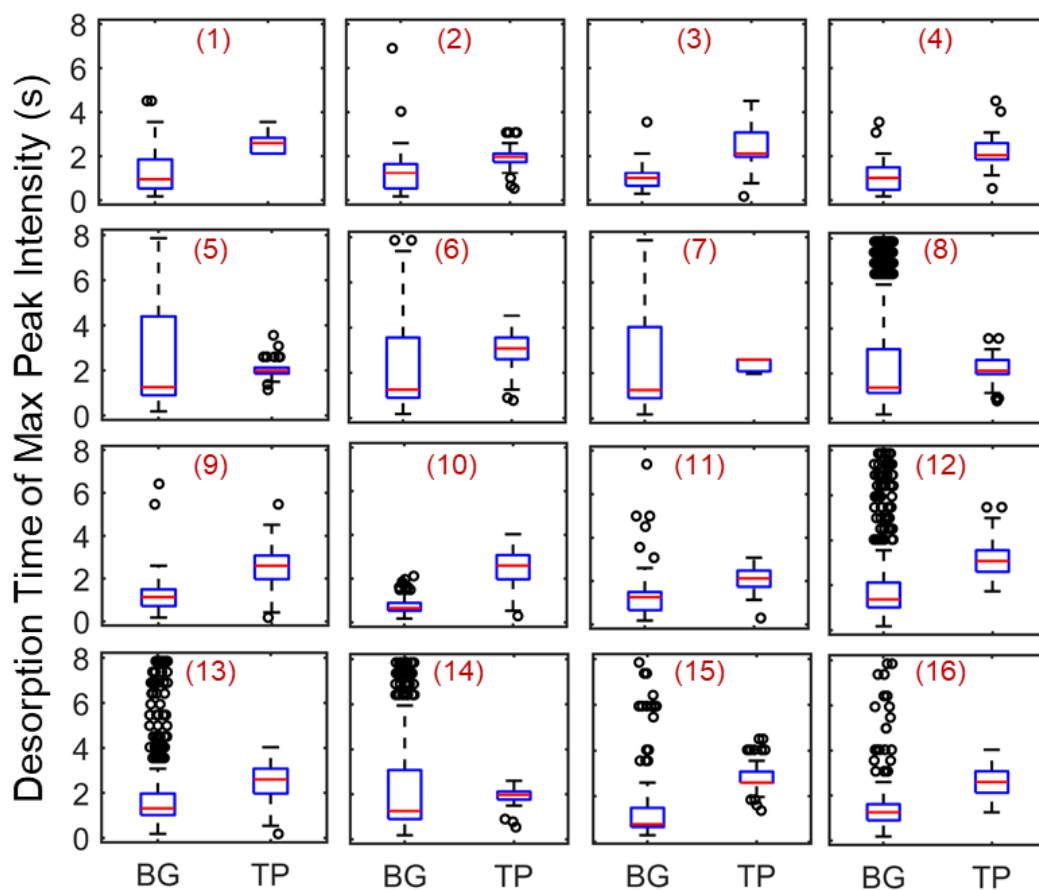

**Figure S8.** Desorption time of the maximum peak intensity of environmental background (BG) observed at each target compound's reduced mobility window, compared to the true positive (TP) target compound maximum peak intensity time (across all mass loadings investigated) on the N/E configured instrument (8 s total sampling time). Boxes represent the median and lower and upper quartiles, whiskers represent  $1.5 \times$  the interquartile range (length of the box), and outliers (o) represent values out of the whisker range. Analyte labels (#) correspond to identifications in Table 2.

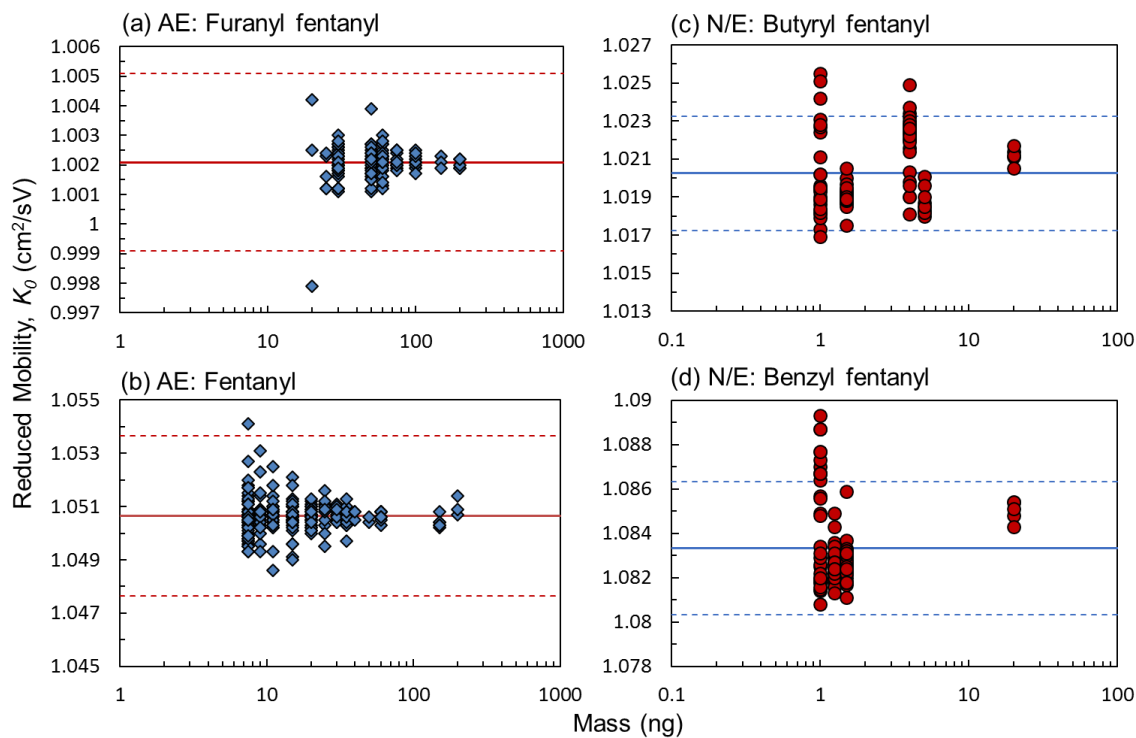

**Figure S9.** Experimentally measured reduced mobilities,  $K_0$ , values as a function of decreasing mass loading for (a) furanyl fentanyl and (b) fentanyl on the AE configured instrument and (c) butyryl fentanyl and (d) benzyl fentanyl on the N/E configured instrument. Average  $K_0$  values (solid horizontal lines) and  $\pm 0.003 \text{ cm}^2/\text{sV}$  windows (dashed horizontal lines) displayed for each.

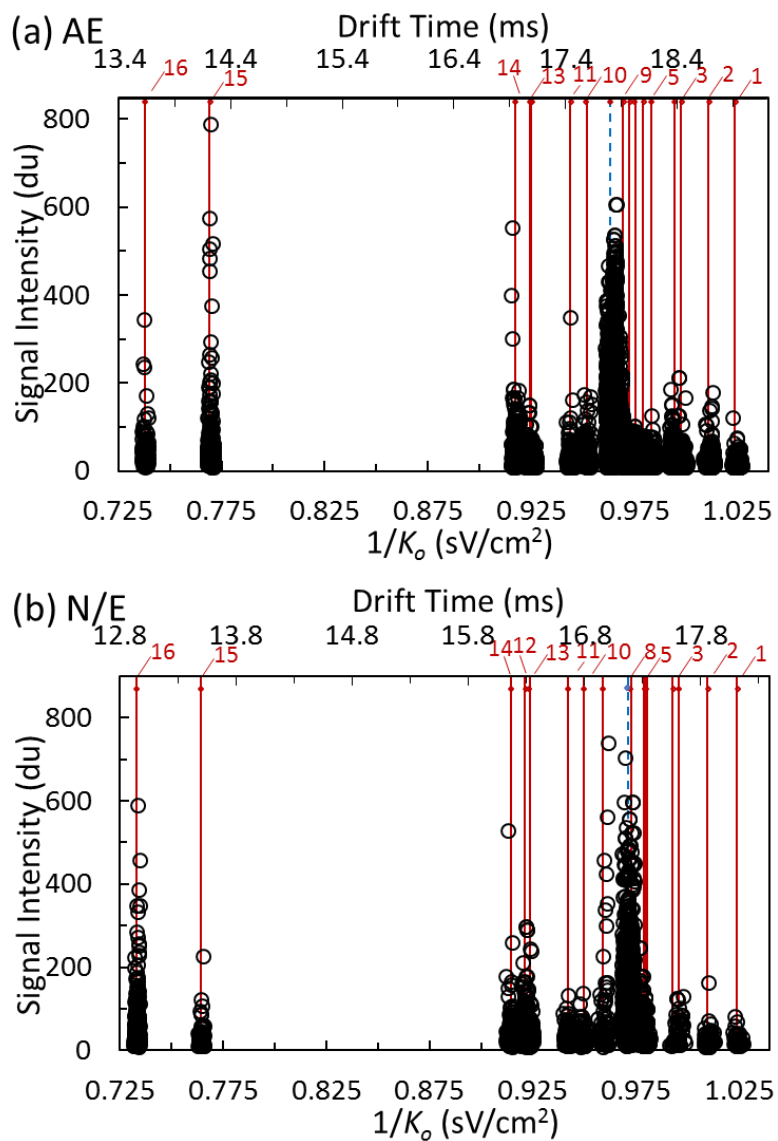

**Figure S10.** Environmental background interferent peak intensity levels for target analyte drift time (top axis) and inverse of reduced mobility (bottom axis) windows from (a) AE and (b) N/E instruments during their deployments. Solid red vertical lines correspond to the reduced mobility values in Table 3 and dashed blue line corresponds to observed deployed location specific background contamination peak. Analyte labels (#) correspond to identifications in Table 2.

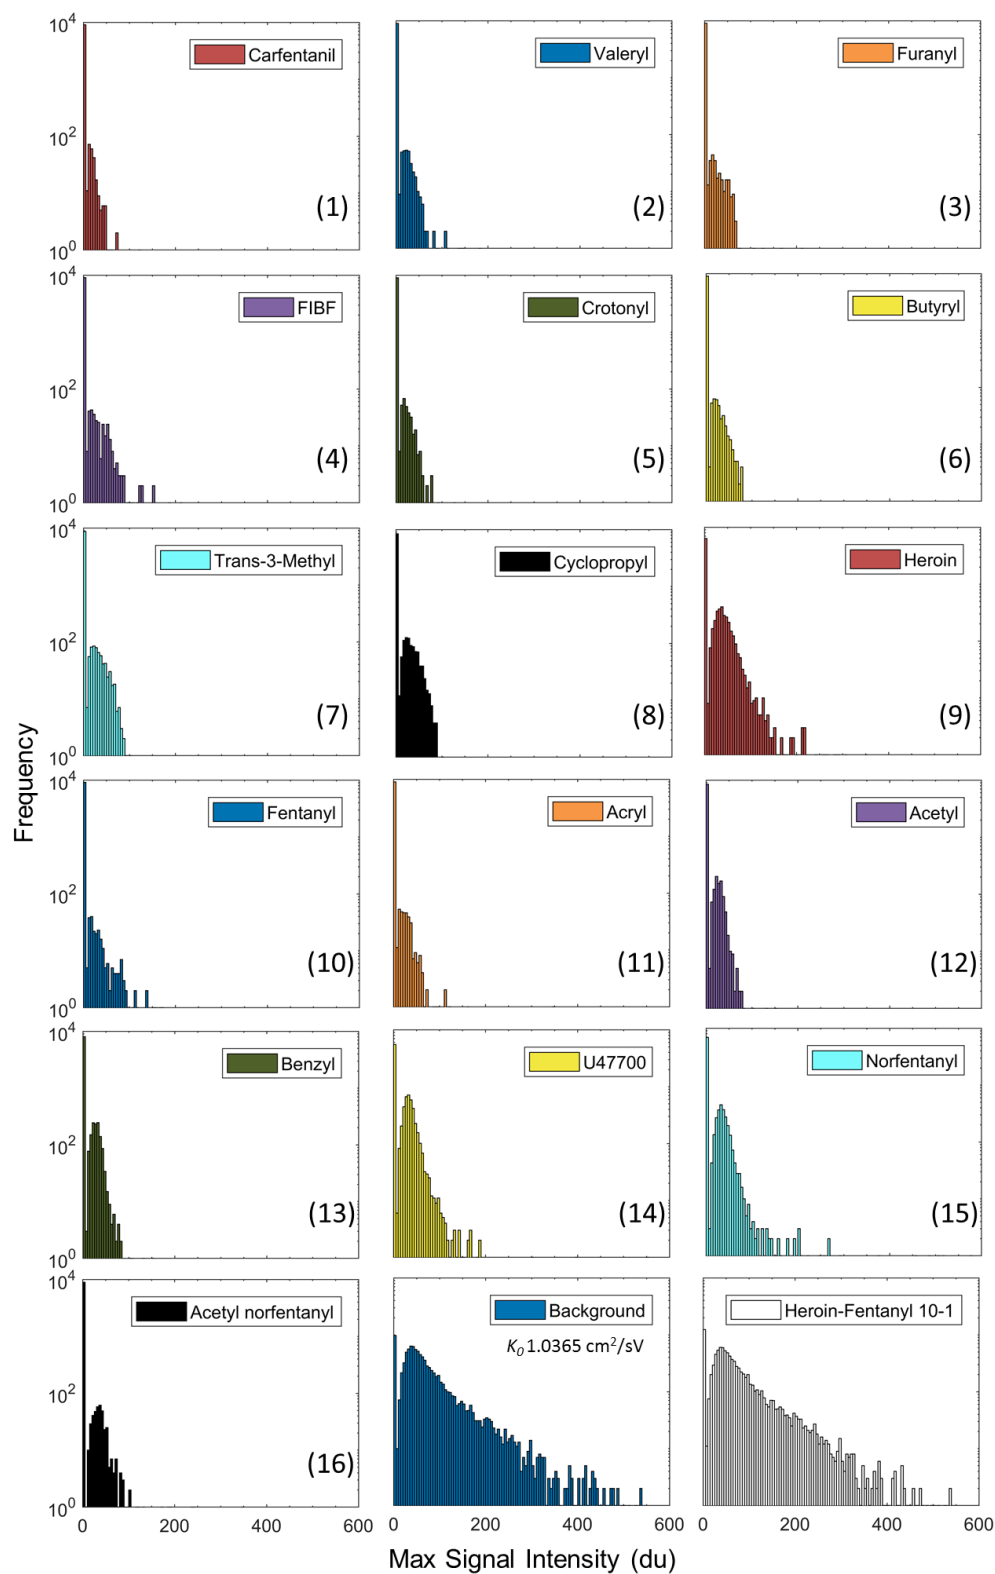

**Figure S11.** Frequency histograms of background intensity data from the deployed AE IMS instrument across a year period (9,359 total files/samples)



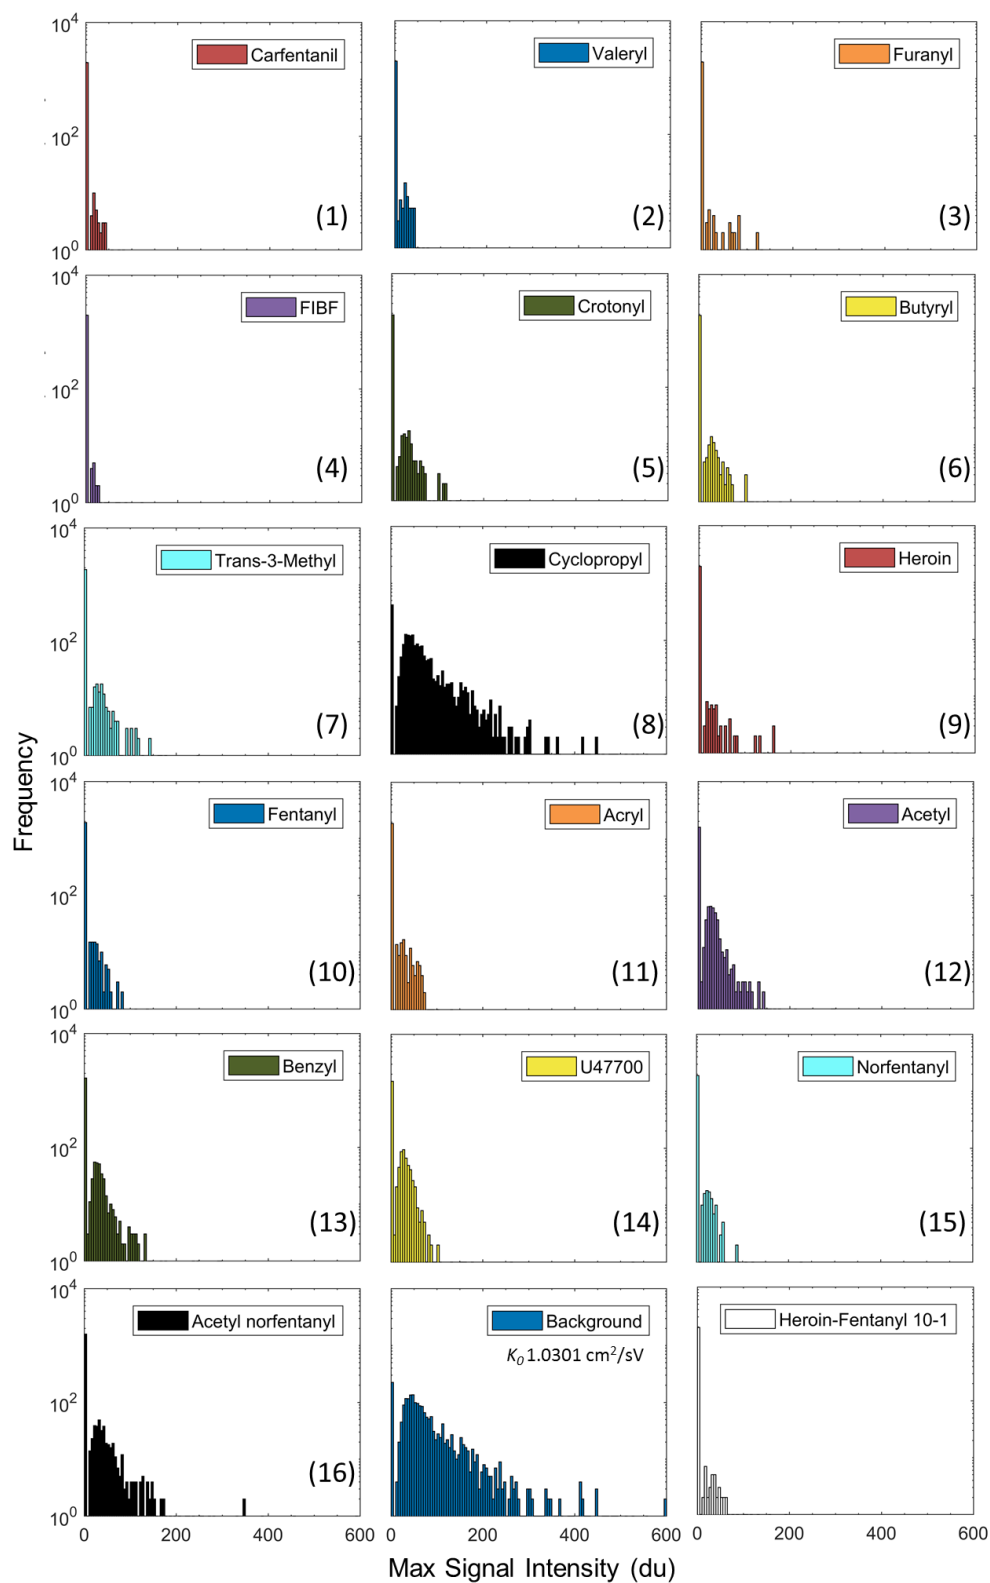

**Figure S12.** Frequency histograms of background intensity data from the deployed N/E IMS instrument across a multi-month period (1,996 total files/samples)

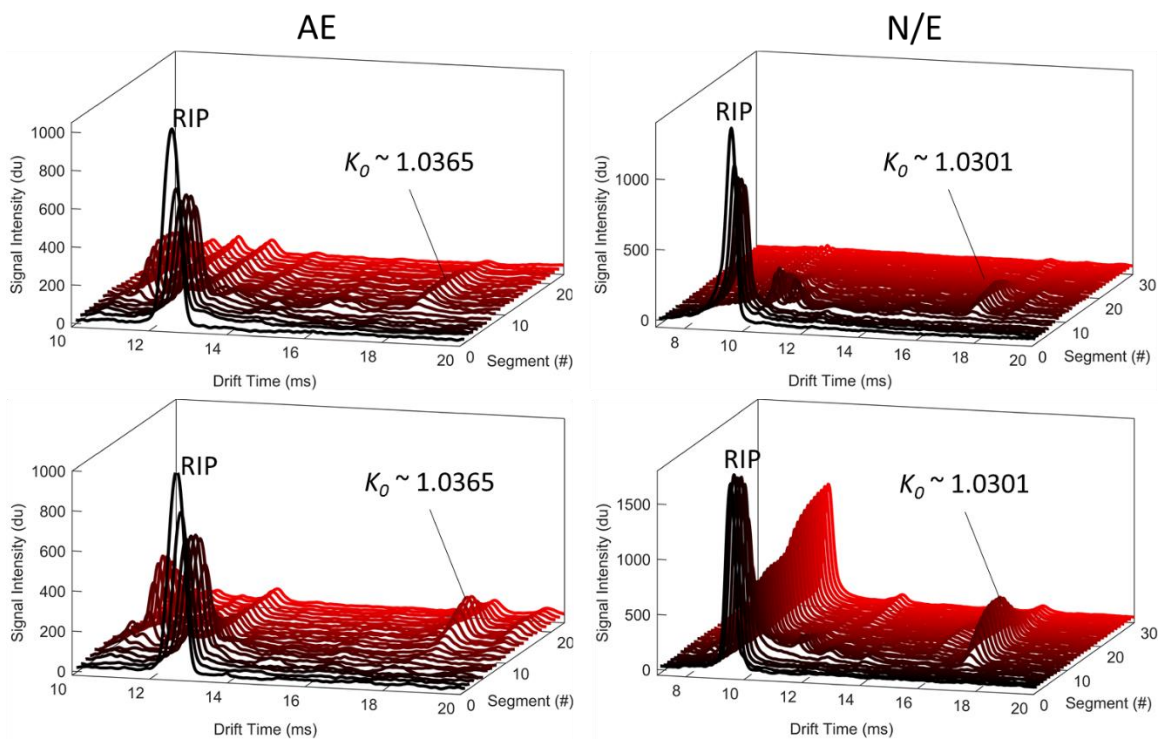

**Figure S13.** Representative IMS spectra as a function of drift time and segment number for vehicle screening background peaks observed in both AE (left) and N/E (right) instruments.

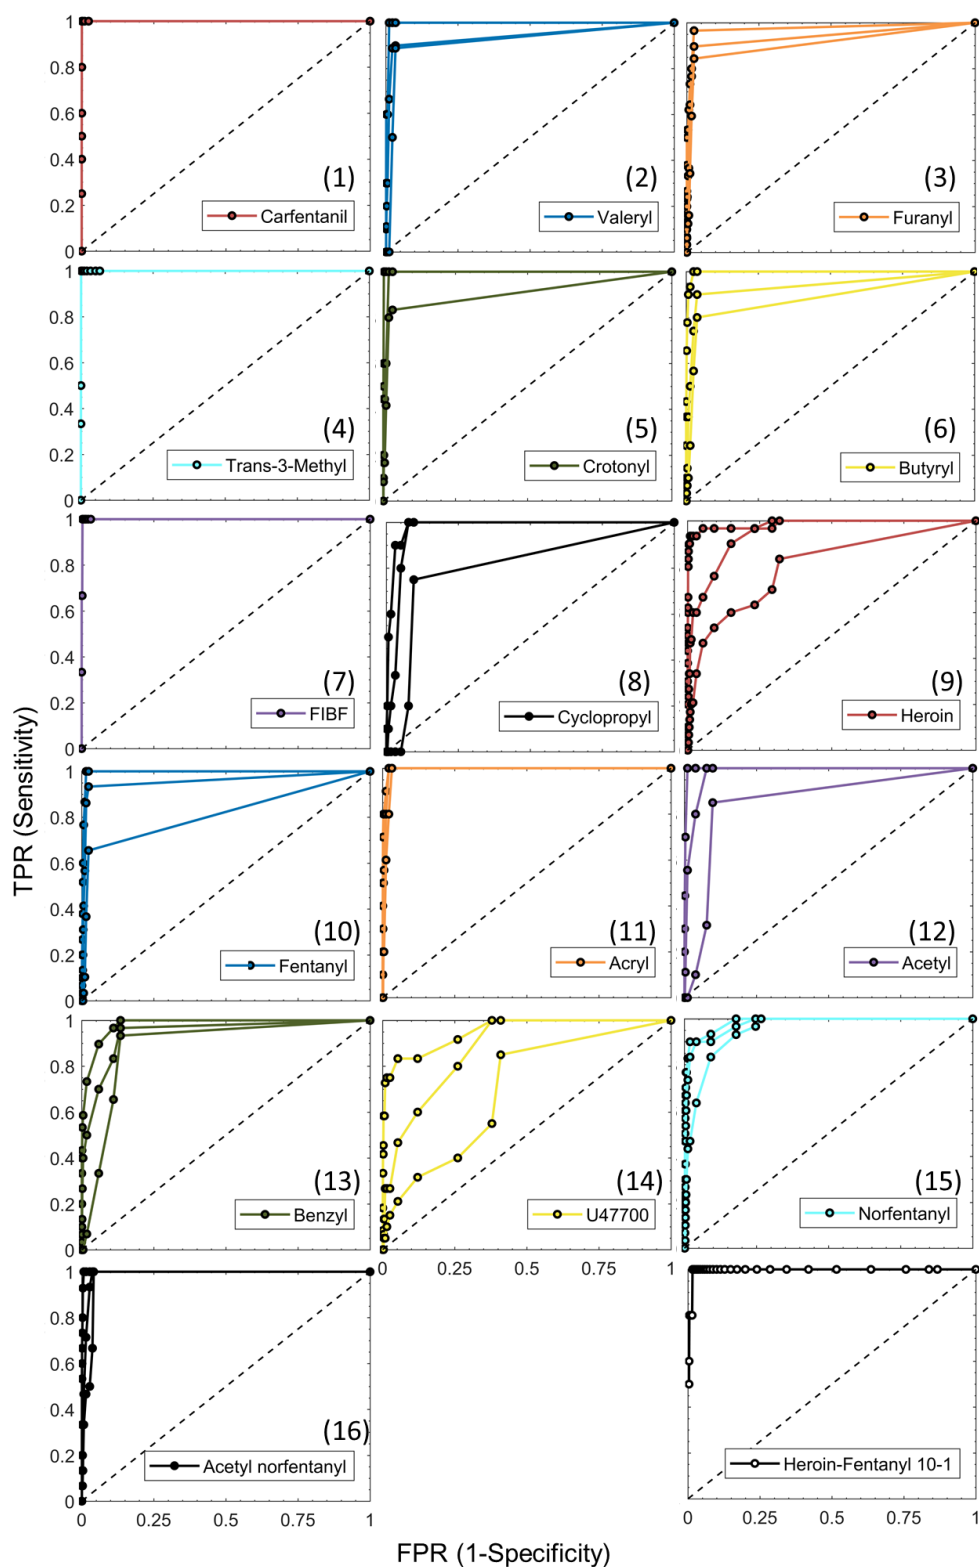

**Figure S14.** ROC Curves for each target analyte at three mass loading levels (see Table 2) for the AE IMS with a  $\pm 0.003$   $\text{cm}^2/\text{sV}$  reduced mobility window. Alarm thresholds were varied from 0 du to 600 du in 10 du increments.

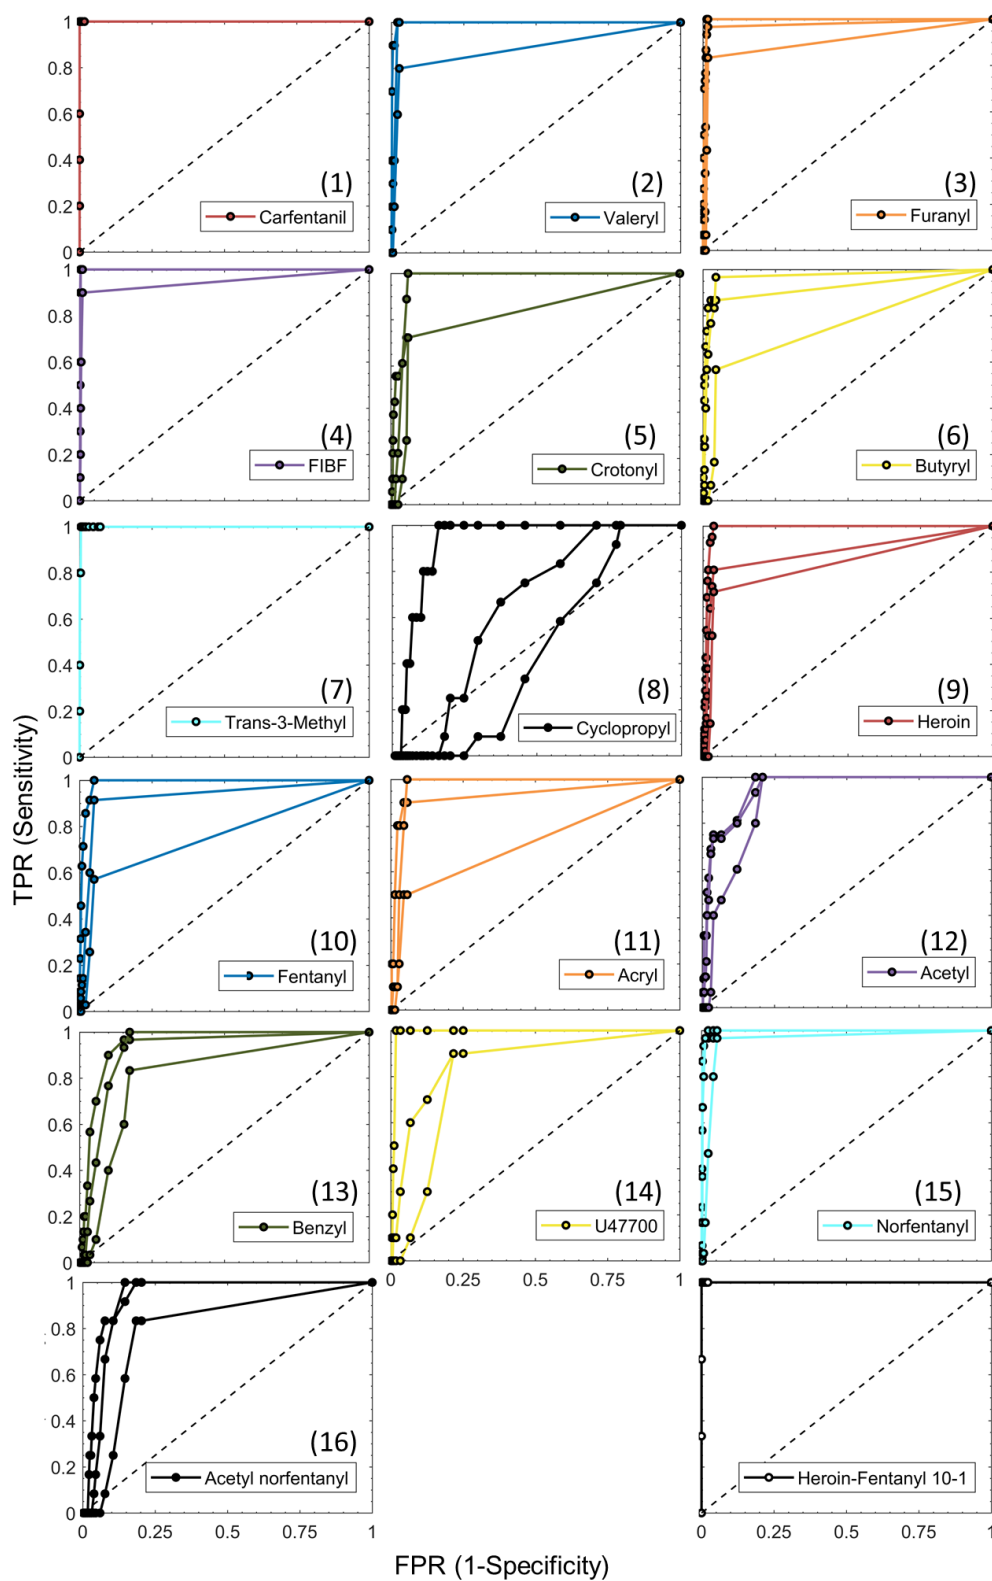

**Figure S15.** ROC Curves for each target analyte at three mass loading levels (see Table 2) for the N/E IMS with a  $\pm 0.003$   $\text{cm}^2/\text{sV}$  reduced mobility window. Alarm thresholds were varied from 0 du to 600 du in 10 du increments.
